# Supplementary material for: QTL analysis reveals genomic variants linked to high-temperature fermentation performance in the industrial yeast
Source: PubMed Central journal article supplement (PMC6423876; doi:10.1186/s13068-019-1398-7), 2019-03-19
Supplement: 13068_2019_1398_MOESM1_ESM.pdf [file 13068_2019_1398_MOESM1_ESM.pdf]

**Table S1. *S. cerevisiae* strains used in this study**

| Strain                                | Description                                                                                                                                | Reference or source |
|---------------------------------------|--------------------------------------------------------------------------------------------------------------------------------------------|---------------------|
| W1 to W121                            | <i>S. cerevisiae</i> strain collection from industry, lab and nature                                                                       | Our lab collection  |
| ScY01                                 | Diploid strain, evolved thermotolerant strain derived from Ethanol Red                                                                     | [11]                |
| W65                                   | Diploid strain, thermosensitive strain                                                                                                     | Our lab collection  |
| ScY01 $\alpha$                        | Haploid segregant from ScY01 with similar thermotolerance, <i>MAT<math>\alpha</math></i>                                                   | This study          |
| W65a                                  | Haploid segregant from W65 with similar thermosensitivity, <i>MAT<math>\alpha</math></i>                                                   | This study          |
| ScY01 $\alpha$ -tp                    | Haploid segregant from ScY01 with similar thermotolerance, <i>MAT<math>\alpha</math></i> , <i>ho::BleoR</i>                                | This study          |
| W65a-sp                               | Haploid segregant from W65 with similar thermosensitivity, <i>MAT<math>\alpha</math></i> , <i>ho::KanMX4</i>                               | This study          |
| tpxsp                                 | Hybrid diploid strain obtained by crossing ScY01 $\alpha$ -tp and W65a-sp                                                                  | This study          |
| tp- <i>rxl2</i> $\Delta$ xsp          | Hybrid diploid strain, ScY01 $\alpha$ -tp ( <i>rxl2::hphB</i> ) crossed with W65a-sp                                                       | This study          |
| tpxsp- <i>rxl2</i> $\Delta$           | Hybrid diploid strain, ScY01 $\alpha$ -tp crossed with W65a-sp ( <i>rxl2::hphB</i> )                                                       | This study          |
| tp- <i>vid24</i> $\Delta$ xsp         | Hybrid diploid strain, ScY01 $\alpha$ -tp ( <i>vid24::hphB</i> ) crossed with W65a-sp                                                      | This study          |
| tpxsp- <i>vid24</i> $\Delta$          | Hybrid diploid strain, ScY01 $\alpha$ -tp crossed with W65a-sp ( <i>vid24::hphB</i> )                                                      | This study          |
| tp- <i>ecm22</i> $\Delta$ xsp         | Hybrid diploid strain, ScY01 $\alpha$ -tp ( <i>ecm22::hphB</i> ) crossed with W65a-sp                                                      | This study          |
| tpxsp- <i>ecm22</i> $\Delta$          | Hybrid diploid strain, ScY01 $\alpha$ -tp crossed with W65a-sp ( <i>ecm22::hphB</i> )                                                      | This study          |
| tp- <i>vps34</i> <sup>E591D</sup> xsp | Hybrid diploid strain, ScY01 $\alpha$ -tp containing the <i>vps34</i> <sup>E591D</sup> allele from W65a-sp crossed with W65a-sp            |                     |
| tpxsp- <i>vps34</i> <sup>D591E</sup>  | Hybrid diploid strain, ScY01 $\alpha$ -tp crossed with W65a-sp containing the <i>vps34</i> <sup>D591E</sup> allele from ScY01 $\alpha$ -tp | This study          |
| tp- <i>csc1</i> <sup>K376Q</sup> xsp  | Hybrid diploid strain, ScY01 $\alpha$ -tp containing the <i>csc1</i> <sup>K376Q</sup> allele from W65a-sp crossed with sp                  | This study          |
| tpxsp- <i>csc1</i> <sup>Q376K</sup>   | Hybrid diploid strain, ScY01 $\alpha$ -tp crossed with W65a-sp containing the <i>csc1</i> <sup>Q376K</sup> allele from ScY01 $\alpha$ -tp  | This study          |
| tp- <i>ira2</i> $\Delta$ xsp          | Hybrid diploid strain, ScY01 $\alpha$ -tp ( <i>ira2::hphB</i> ) crossed with W65a-sp                                                       | This study          |
| tpxsp- <i>ira2</i> $\Delta$           | Hybrid diploid strain, ScY01 $\alpha$ -tp crossed with W65a-sp ( <i>ira2::hphB</i> )                                                       | This study          |
| tp- <i>avo1</i> <sup>V853A</sup> xsp  | Hybrid diploid strain, ScY01 $\alpha$ -tp containing the <i>avo1</i> <sup>V853A</sup> allele from W65a-sp crossed with W65a-sp             | This study          |
| tpxsp- <i>avo1</i> <sup>A853V</sup>   | Hybrid diploid strain, ScY01 $\alpha$ -tp crossed with W65a-sp containing the <i>avo1</i> <sup>A853V</sup> allele from ScY01 $\alpha$ -tp  | This study          |
| tp- <i>dap1</i> $\Delta$ xsp          | Hybrid diploid strain, ScY01 $\alpha$ -tp ( <i>dap1::hphB</i> ) crossed with W65a-sp                                                       | This study          |
| tpxsp- <i>dap1</i> $\Delta$           | Hybrid diploid strain, ScY01 $\alpha$ -tp crossed with W65a-sp ( <i>dap1::hphB</i> )                                                       | This study          |
| <b>Plasmids</b>                       |                                                                                                                                            |                     |
| pREMI-Z                               | Zeocin-resistance plasmid containing zeocin resistance cassette (BleoR)                                                                    | [46]                |
| pFA6-kanMX4                           | Geneticin-resistance plasmid containing KanMX4 module                                                                                      | [47]                |
| pRS426-hphB                           | Hygromycin-resistance plasmid by replacing <i>URA3</i> coding region with the hygromycin B resistance gene from <i>Escherichia coli</i>    | In our lab, [56]    |

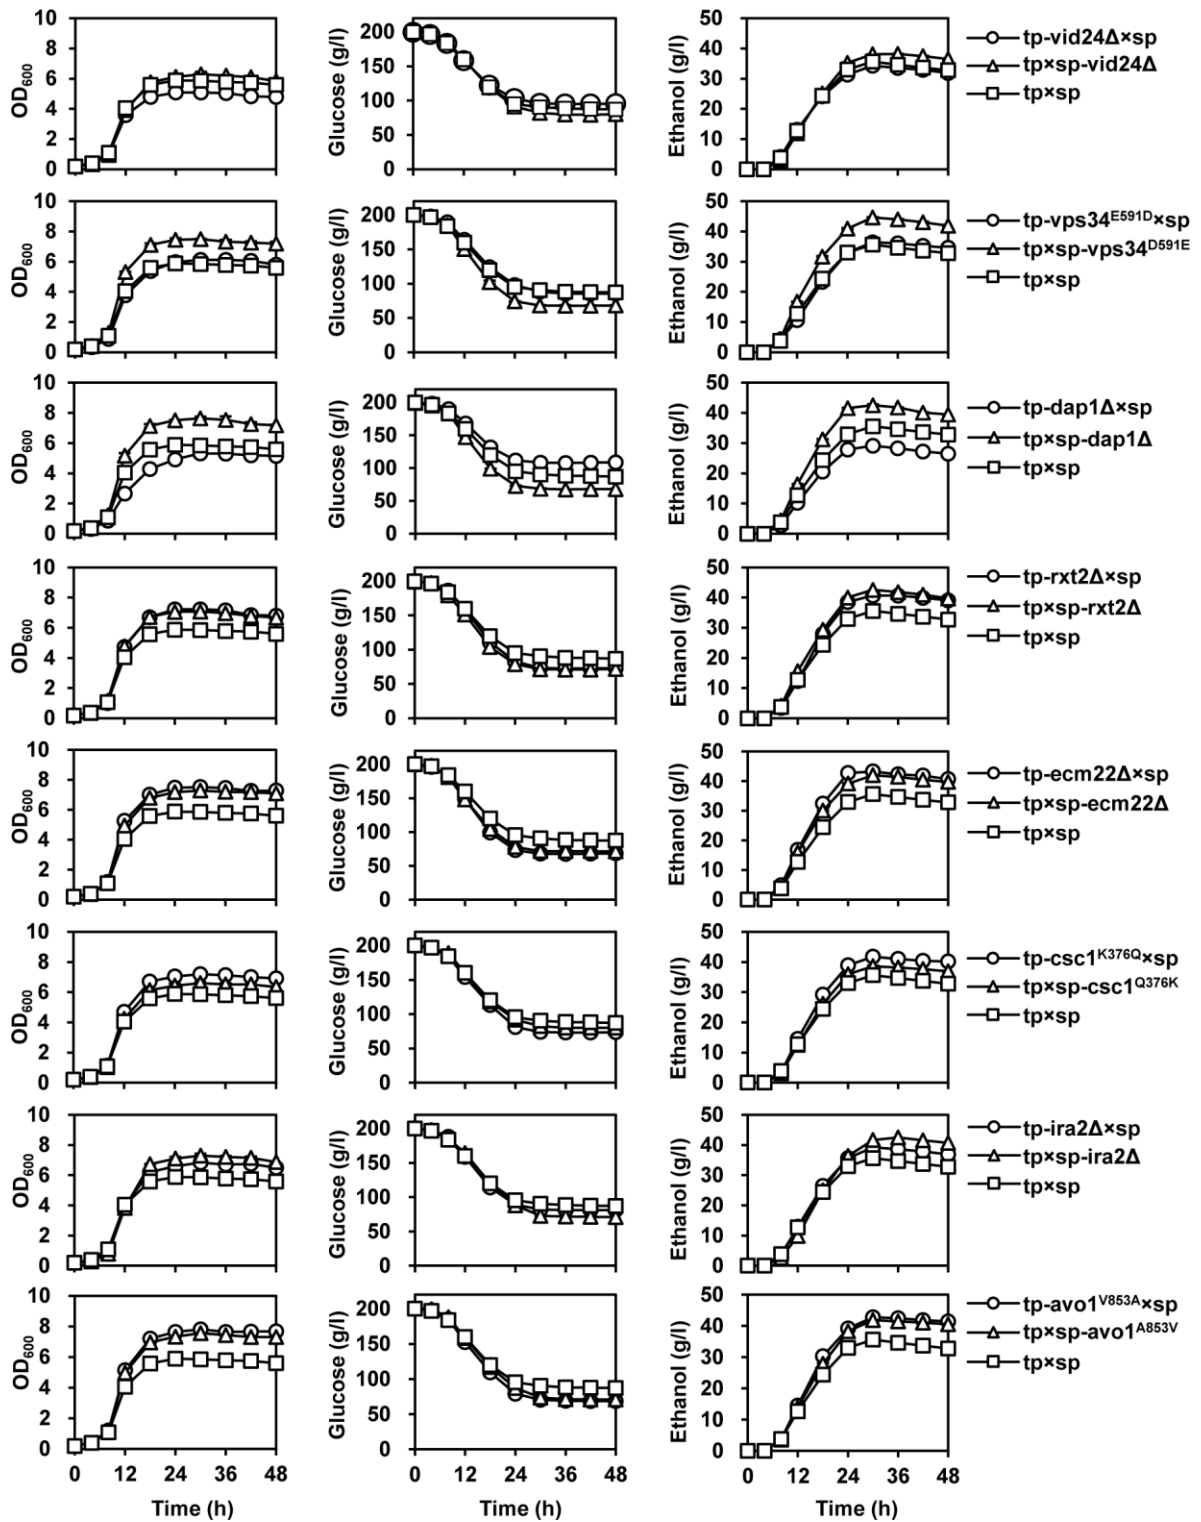

**Figure S1. Fermentation profiles of RHA and allele replacement strains of the causative genes.**

The RHA and allele replacement strains were detailed in Additional file 1: Table S1. High-temperature fermentation capacities were evaluated at 42°C in 100-

ml Erlenmeyer flasks containing 50 ml YP medium with 200 g/l glucose at 220 rpm. Data represent the mean and standard error of duplicate cultures at each condition (some error bars are covered by symbols).
